# Supplementary material for: Acute Exercise Improves Inhibitory Control but Not Error Detection in Male Violent Perpetrators: An ERPs Study With the Emotional Stop Signal Task
Source: PubMed Central journal article supplement (PMC9045000; doi:10.3389/fnhum.2022.796180), 2022-04-13
Supplement: Data_Sheet_1.pdf [file Data_Sheet_1.pdf]

## *Supplementary Materials*

### **S1. List of emotional stimuli**

The current study used the following emotional stimuli from the International Affective Picture System (IAPS) for the emotional stop signal task. The description of the task design and procedure can be found in the Methods section of the main text.

| Type       | Number of stimuli                                                                                                                |
|------------|----------------------------------------------------------------------------------------------------------------------------------|
| Pleasant   | Set 1 1440, 1450, 1460, 1463, 1500, 1510, 1540, 1590, 1600, 1602, 1603, 1604, 1610, 1620, 1660, 1670, 1710, 1731, 1750, 1810     |
|            | Set 2 1812, 1850, 1900, 1910, 1920, 1942, 1947, 5000, 5001, 5010, 5020, 5030, 5200, 5201, 5220, 5250, 5260, 5270, 5300, 5390     |
|            | Set 3 5480, 5593, 5594, 5660, 5700, 5711, 5720, 5740, 5750, 5760, 5779, 5780, 5800, 5811, 5820, 5870, 5890, 7009, 7233, 7270     |
| Unpleasant | Set 1 2055.1, 2352.2, 3000, 3010, 3030, 3060, 3061, 3064, 3069, 3071, 3101, 3102, 3120, 3130, 3140, 3150, 3160, 3168, 3266, 9400 |
|            | Set 2 9405, 9420, 9433, 3005.1, 3022, 2095, 2900, 3181, 3220, 3230, 3301, 3350, 9530, 9040, 9050, 9342, 9410, 9415, 9440, 9471   |
|            | Set 3 9480, 9635.1, 9910, 9920, 2683, 3500, 3530, 6211, 6244, 6250, 6312, 6313, 6510, 6550, 6570, 6571, 6831, 6838, 9252, 9265   |

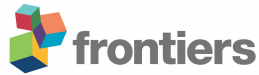

**S2. Comparisons of the Reactive-Proactive Questionnaire (RPQ) scores between the current sample and an age-matched non-violent offender group.**

In addition to using criminal history as an inclusion criterion for our participants, we performed additional independent *t*-tests to examine whether the participants in the current study have higher aggressive traits than an age-matched non-violent offender group from another dataset in our lab. These non-violent offenders (*n* = 17) were recruited from the same prisons as our violent individuals. However, they were sentenced due to the offense(s) other than violence (e.g., forging instruments or seals, larceny, or fraudulent). The *t*-tests showed that the proactive aggression (*t* (20.06) = 3.61, *p* < .01, 95% CI [.97, 3.61]), reactive regression (*t* (30) = 2.78, *p* < .01, 95% CI [.65, 4.26]), and summed RPQ score (*t* (30) = 3.42, *p* < .01, 95% CI [1.91, 7.57]) were all higher for the violent offenders than for the non-violent offenders.

Table S2 Comparisons of the Reactive-Proactive Questionnaire (RPQ) scores between the current sample and an age-matched non-violent offender group

| Variables               | Violent group ( <i>n</i> = 15)<br><i>M</i> ( <i>SD</i> ) | Non-violent group ( <i>n</i> = 17)<br><i>M</i> ( <i>SD</i> ) | <i>t</i> ( <i>df</i> ) | <i>p</i> |
|-------------------------|----------------------------------------------------------|--------------------------------------------------------------|------------------------|----------|
| Age                     | 30.13 (7.95)                                             | 31.06 (6.94)                                                 | -.35 (30)              | .73      |
| RPQ: Proactive subscale | 2.93 (2.22)                                              | .65 (1.12)                                                   | 3.61 (20.06)           | .002     |
| RPQ: Reactive subscale  | 5.87 (2.70)                                              | 3.41 (2.29)                                                  | 2.78 (30)              | .009     |
| RPQ: Summed score       | 8.80 (4.66)                                              | 4.06 (3.11)                                                  | 3.42 (30)              | .002     |
